# Supplementary material for: Evaluation of a high-resolution micro-sized magic angle spinning (HRμMAS) probe for NMR-based metabolomic studies of nanoliter samples
Source: Royal Society of Chemistry journal article supplement (doi:10.1039/c6ay01654e), 2016-01-01
Supplement: c6ay01654e1.pdf [file c6ay01654e1.pdf]

## Electronic Supplementary Information

### Evaluation of a high-resolution micro-size magic angle spinning (HR $\mu$ MAS) probe for NMR-based metabolomic studies of nanolitre samples

Nghia Tuan Duong,<sup>a</sup> Yuki Endo,<sup>b</sup> Takahiro Nemoto,<sup>b</sup> Hiroshi Kato,<sup>b</sup> Anne-Karine Bouzier-Sore,<sup>c</sup> Yusuke Nishiyama<sup>a,b</sup> and Alan Wong<sup>\*,d</sup>

*a) RIKEN CLST-JEOL Collaboration Center, Tsurumi, Yokohama, Kanagawa 230-0045, Japan*

*b) JEOL RESONANCE Inc., 3-1-2 Musashino, Akishima, Tokyo 196-8558, Japan*

*c) Centre de Résonance Magnétique des Systèmes Biologiques, CNRS-Université de Bordeaux, UMR5536, Bordeaux, France*

*d) NIMBE, CEA, CNRS, Université Paris-Saclay, CEA Saclay, 91191, Gif-sur-Yvette, France*

*\*corresponding author, E-mail: alan.wong@cea.fr*

---

|                           |    |
|---------------------------|----|
| Table S1 Peak assignments | p2 |
| Figure S1 Handling tools  | p3 |
| Figure S2 MAS profile     | p4 |
| Figure S3 HR-MAS spectra  | p5 |

Table S1. Tentative peak assignments of the identified metabolites found in liver and brain extracts.

| assigned index | <sup>1</sup> H shift / ppm (multiplicity) | metabolite                        | abbreviation |
|----------------|-------------------------------------------|-----------------------------------|--------------|
| 1              | 1.33(d), 4.11(q)                          | lactate                           | lac          |
| 2              | 1.48(d)                                   | alanine                           | ala          |
| 3              | 1.91(t), 2.30(t)                          | γ-aminobutyric acid               | GABA         |
| 4              | 2.02(s), 2.51(dd), 2.68(dd), 4.39(dd)     | N-acetyl aspartate                | NAA          |
| 5              | 2.04(s)                                   | N-acetylaspartylglutamate         | NAAG         |
| 6              | 2.06(m), 2.35(m), 3.76(m)                 | glutamate                         | glu          |
| 7              | 2.12(m), 2.45(m), 3.76(m)                 | glutamine                         | gln          |
| 8              | 2.37(s)                                   | pyruvate                          |              |
| 9              | 2.40(s)                                   | succinate                         | suc          |
| 10             | 2.81(dd)                                  | aspartate                         | asp          |
| 11             | 3.04(s), 3.93(s)                          | creatine/phosphocreatine          | Cr/PCr       |
| 12             | 3.19(s)                                   | choline                           | cho          |
| 13             | 3.21(s)                                   | phosphorylcholine                 | PC           |
| 14             | 3.22(s)                                   | glycerophosphocholine             | GPC          |
| 15             | 3.26(m), 3.43(t)                          | taurine                           | tau          |
| 16             | 3.28(t), 3.55(t), 3.63(t), 4.06(m)        | <i>myo</i> -inositol              | m-ins        |
| 17             | 3.56(s)                                   | glycine                           | gly          |
| 18             | 3.3-3.9(m), 4.65(d), 5.23(d)              | glucose                           | glc          |
| 19             | 6.14(d), 8.22(s)                          | inosine or adenosine triphosphate | Ino/ATP      |
| 20?            | 3.01(m)                                   | lysine?                           | lys          |
| 21             | 2.65(s)                                   | citrate                           | –            |
| 22             | 3.53(dd)                                  | glycerol                          | –            |

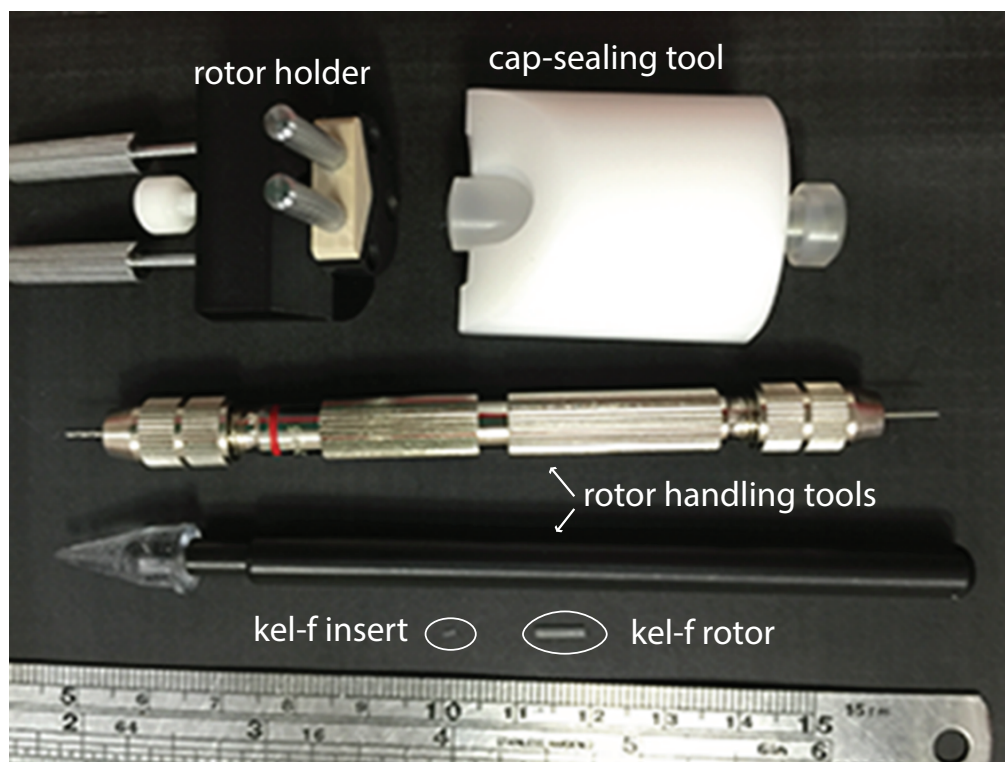

Figure S1. Custom-made tools for the sample preparations.

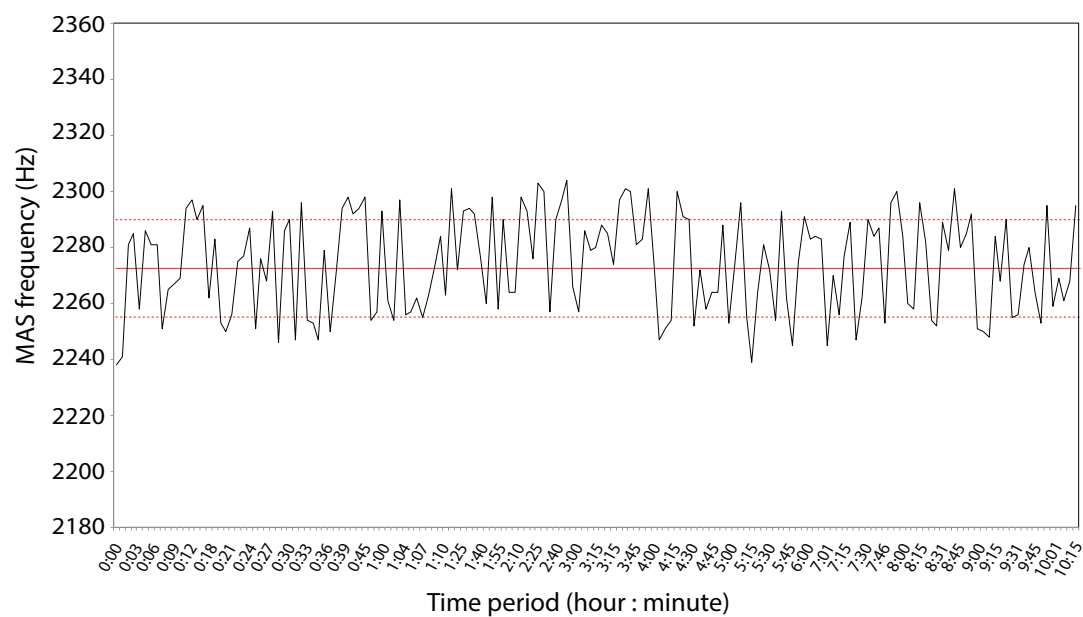

Figure S2. MAS profile of HR $\mu$ MAS using a JEOL MAS pneumatic unit. It shows the fluctuation of the spinning frequency over a 10-hour timespan with a mean frequency of 2275 Hz (solid red line) with a standard deviation of  $\pm 17$  Hz (dashed red lines).

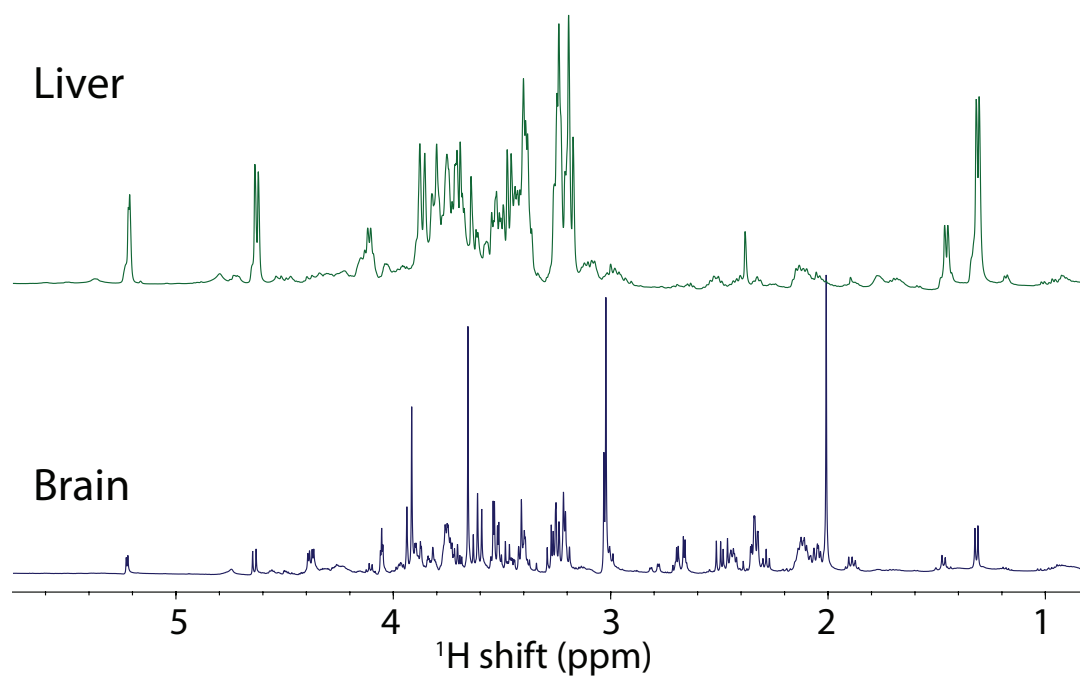

Figure S3.  $^1\text{H}$  HR-MAS NMR spectra of liver and brain extract with a significant high sample mass concentration,  $\sim 7$  g/ml and  $\sim 6$  g/ml, respectively. The sample volume is about  $50 \mu\text{l}$ . The spectra were acquired at a 500 MHz Bruker spectrometer with a water-suppression single-pulse experiment. A total of 256 scans were collected with a 8 s recycle delay.
